# Supplementary material
Source: Springer Nature journal article supplement (https://www.springermedizin.de/resource/supplementary/12889_2008_1491_MOESM12_ESM.pdf/9504408)

### Overweight

### Obese

0.5 1 2 4 16

0.5 1 2 4 16 32

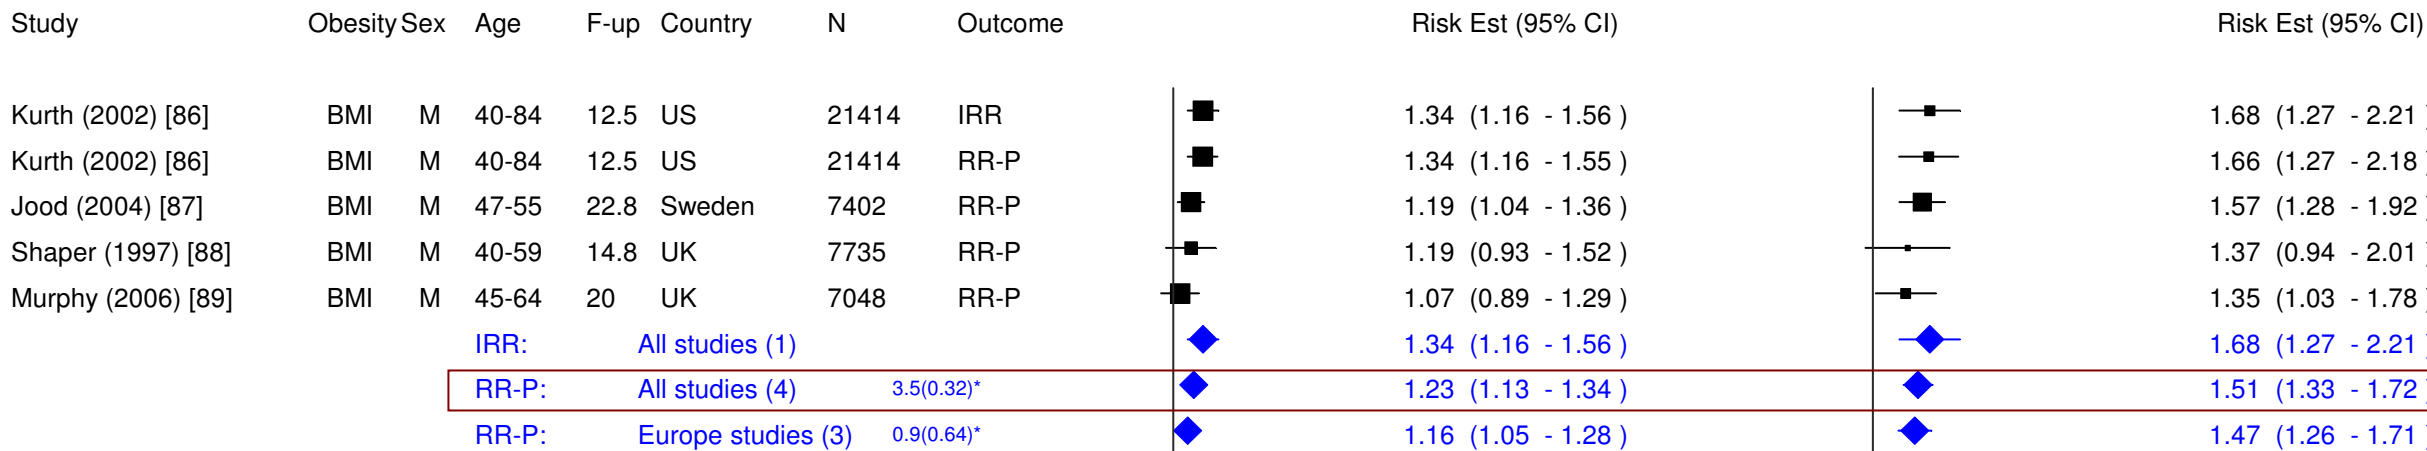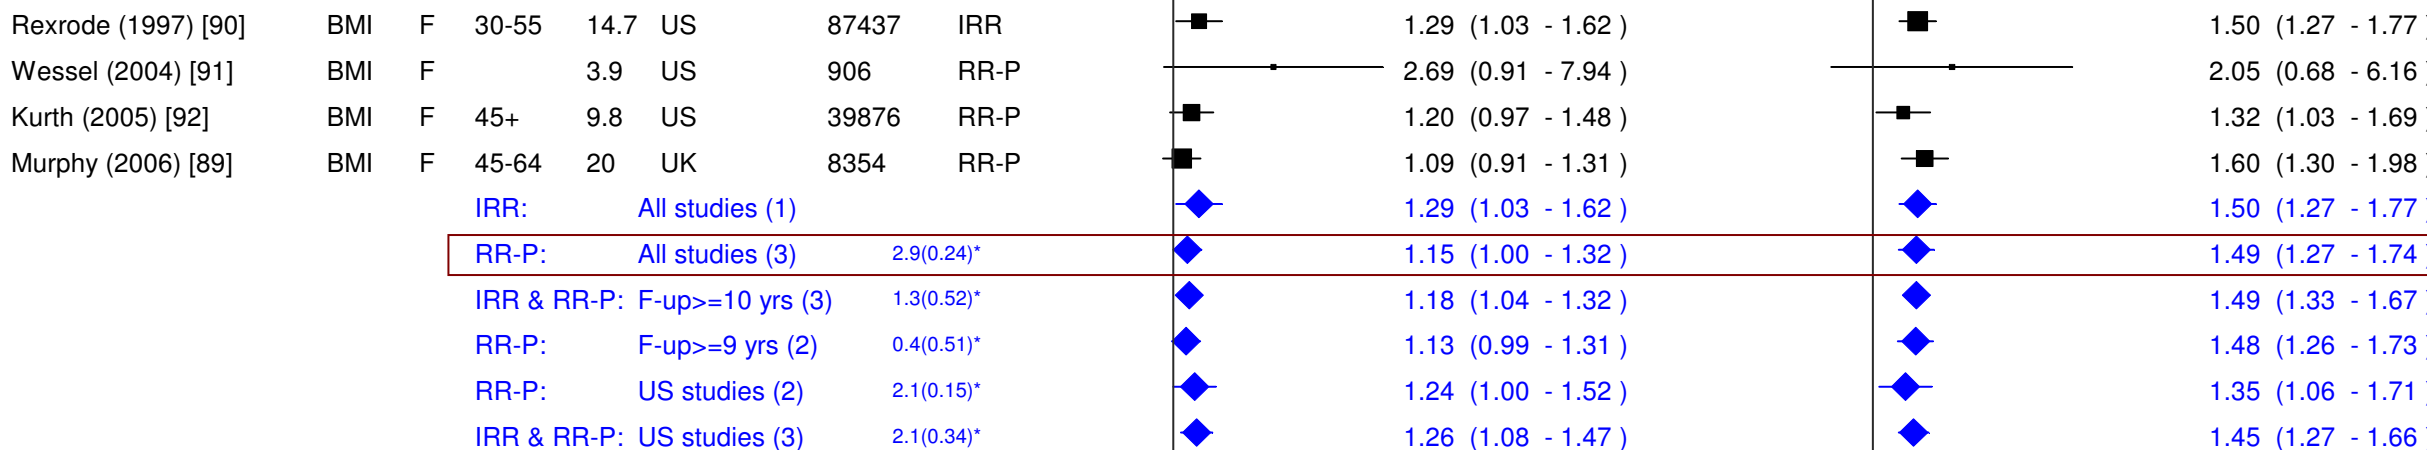

0.5 1 2 4 16

0.5 1 2 4 16 32

RR

RR

Supplement: MOESM12 [file 9504408]
